# Supplementary material for: Sodium orthovanadate overcomes sorafenib resistance of hepatocellular carcinoma cells by inhibiting Na+/K+-ATPase activity and hypoxia-inducible pathways
Source: PubMed Central journal article supplement (PMC6018801; doi:10.1038/s41598-018-28010-y), 2018-06-26

**Supplementary Information for:**

**Sodium orthovanadate overcomes sorafenib resistance of hepatocellular carcinoma cells by inhibiting Na<sup>+</sup>/K<sup>+</sup>-ATPase activity and hypoxia-inducible pathways**

Wenjing Jiang<sup>1</sup>, Guangxin Li<sup>2</sup>, Weidong Li<sup>1,3</sup>, Ping Wang<sup>3,4</sup>, Peng Xiu<sup>2</sup>, Xian Jiang<sup>1</sup>, Bing Liu<sup>1</sup>, Xueying Sun<sup>1,3\*</sup>, Hongchi Jiang<sup>1,\*</sup>

<sup>1</sup>Department of General Surgery, the First Affiliated Hospital of Harbin Medical University, Harbin 150001, China.

<sup>2</sup>Department of General Surgery, Qianfoshan Hospital Affiliated to Shandong University, Jinan 250014, China

<sup>3</sup>The Hepatosplenic Surgery Center, the First Affiliated Hospital of Harbin Medical University, Harbin 150001, China.

<sup>4</sup>Department of Interventional Radiology, The Third Affiliated Hospital of Harbin Medical University, Harbin 150081, China.

\*Correspondence and requests for materials should be addressed to Hongchi Jiang, (E-mail: [jianghongchi@hrbmu.edu.cn](mailto:jianghongchi@hrbmu.edu.cn)) or Xueying Sun (Email: [sunxueying@hrbmu.edu.cn](mailto:sunxueying@hrbmu.edu.cn) or [k.sun@auckland.ac.nz](mailto:k.sun@auckland.ac.nz)).

## Contents

|                                                                             |    |
|-----------------------------------------------------------------------------|----|
| <b>Supplementary Materials and Methods</b> .....                            | 3  |
| Antibodies and reagents .....                                               | 3  |
| Immunocytochemistry.....                                                    | 4  |
| Cell proliferation analysis.....                                            | 4  |
| Assessment of cell cycle and apoptosis <i>in vitro</i> .....                | 4  |
| Immunoblotting analysis.....                                                | 5  |
| Quantitative reverse-transcription polymerase chain reaction (qRT-PCR)..... | 6  |
| Transfection of siRNA.....                                                  | 6  |
| Measurement of mitochondrial membrane potential.....                        | 6  |
| Immunohistochemistry and <i>In situ</i> Ki-67 proliferation index.....      | 7  |
| <i>In situ</i> detection of apoptotic cells.....                            | 7  |
| References.....                                                             | 8  |
| Genes examined, primers used for RT-PCR and PCR products (Table S1).....    | 9  |
| Figure S1.....                                                              | 10 |
| Figure S2.....                                                              | 11 |
| Figure S3.....                                                              | 12 |
| Figure S4.....                                                              | 13 |
| Figure S5.....                                                              | 14 |
| Figure S6.....                                                              | 15 |
| Figure S7.....                                                              | 16 |
| Figure S8.....                                                              | 17 |
| Figure S9.....                                                              | 18 |
| Full-length gels and blots of immunoblotting.....                           | 20 |

## Supplementary Materials and Methods

### Antibodies and reagents

An antibody (Ab) against Ki67 (ab15580) was from Abcam (Cambridge, MA, USA). Abs against phospho-cdc2 (Tyr161) (#9114), cyclin B1 (#4135) and phospho-cyclin B1 (Ser147) (#4131), PARP (#9542), caspase-9 (#9508) and caspase-3 (#9665) were purchased from Cell Signaling Technology (Danvers, USA). Abs against Na<sup>+</sup>/K<sup>+</sup>-ATPase  $\alpha$ 3 (sc-16052), CDK1 (sc-137035), HIF-1 $\alpha$  (sc-13515), HIF-2 $\alpha$  (sc-13596), ARNT (sc-17811), VEGF (sc-152), LDHA (sc-130327), GLUT1 (sc-377228) and  $\beta$ -actin (sc-130065), and a fluorescein isothiocyanate (FITC)-conjugated rat anti-mouse Ab (sc-516140) were from Santa Cruz Biotechnology (CA, USA). Sorafenib was from Jinan Trio Pharmatech Co., Ltd, and dissolved in dimethyl sulfoxide to make a stock solution of 10 mM. Sodium orthovanadate and ouabain octahydrate were from Sigma-Aldrich (Shanghai, China) and dissolved in phosphate-buffered saline (PBS). For animal experiments, sorafenib was suspended in the vehicle solution containing Cremophor (Sigma-Aldrich), 95% ethanol and water in a ratio of 1:1:6. The PI (propidium iodide)/Annexin V-FITC apoptosis detection kit was from BD Biosciences. The Cell Counting Kit-8 (CCK-8) kit was from Dojindo Molecular Technologies, Gaithersburg, MD, USA). Terminal deoxynucleotidyl transferase-mediated dUTP nick end labeling agent (TUNEL) was from Roche.

### **Immunocytochemistry**

Cells were fixed with 4% paraformaldehyde, and permeabilized with 0.1% Triton X-100 in PBS. Cells were blocked in 10% normal serum for 30 min, and then incubated with a primary Ab against Na<sup>+</sup>/K<sup>+</sup>-ATPase  $\alpha$ 3 subunit for 90 min, followed by an FITC-conjugated rat anti-mouse Ab. Cells were visualized under confocal microscopy.

### **Cell proliferation analysis**

Cells were seeded into a 96-well plate ( $3 \times 10^3$ /well) in triplicate and cultured overnight. The culture medium was replaced with fresh FBS-free media containing vehicle or testing reagents at various concentrations. Cell viability was measured with a CCK-8 kit. Untreated cells served as controls. Cell viability (%) was calculated according to the formula: experimental OD value/control OD value  $\times 100\%$ .

### **Assessment of cell cycle and apoptosis *in vitro***

Cells were seeded at  $5.0 \times 10^5$  cells/well in six-well plates and incubated with different reagents for 48 h, and then harvested and counted. A Cell Cycle kit (BD Biosciences, Beijing, China) was used to determine the percentages of cells at different phases of cell cycle by using flow cytometry with a Beckman Coulter Epics Altra II cytometer (Beckman Coulter, California, USA). Cells ( $1 \times 10^5$ ) were incubated in 110  $\mu$ l of binding buffer containing 5  $\mu$ l of Annexin V and 5  $\mu$ l of PI for 15 min at room temperature in dark, and then subjected to flow cytometry to measure the apoptosis rate (%) with the cytometer. Or cells were visualized under laser scanning confocal

microscopy.

### **Immunoblotting analysis**

Cells or tumor tissues were homogenized in protein lysate buffer (50 mM Tris pH 7.4, 100  $\mu$ M EDTA, 0.25 M sucrose, 1%SDS, 1% NP40, 1 $\mu$ g/ml leupeptin, 1 $\mu$ g/ml pepstatin A and 100  $\mu$ M phenyl methyl sulfonyl flouride) and debris was removed by centrifugation at 10,000  $\times$  g for 10 min at 4°C. Protein concentrations were determined (Bio-Rad, Richmond, CA, USA). Lysates were resolved on sodium dodecyl sulfate-polyacrylamide (SDS-PAGE) gels, and then electrophoretically transferred to polyvinylidene difluoride (PVDF) membranes. The membranes were blocked in TBST (137 mM NaCl, 20 mM Tris HCl [pH 7.6], and 0.1% [v/v] Tween 20) containing 5% (w/v) nonfat dry milk at 37°C for 2 h, and then incubated overnight with primary Abs, and subsequently with alkaline phosphatase-conjugated secondary Abs for 2 h at room temperature in the dark. They were developed with 5-bromo-4-chloro-3-indolyl phosphate (BCIP)/ nitro blue tetrazolium (NBT) (Tiangen Biotech Co. Ltd., Beijing, China). The density of each band was measured using a densitometric analysis program (FR200, Shanghai, China). In preliminary experiments, serial dilutions of lysates (containing 2.5, 5, 10, 20, 40 or 80 $\mu$ g protein) were immunoblotted; band intensities were measured and plotted against protein amounts to generate a standard curve, and the amount of protein for each blot was determined.

### **Quantitative reverse-transcription polymerase chain reaction (qRT-PCR)**

Methods have been described in details previously<sup>1,2</sup>. Briefly, total RNA was extracted from cells, and cDNA synthesized. The reaction mixtures for qRT-PCR were prepared with the primers as shown in Table S1. The PCR products were analyzed by MX3000P Real-time PCR systems (Stratagen, USA). Experiments were performed in triplicate, and data were calculated by  $\Delta\Delta C_t$  methods.

### **Transfection of siRNA**

The methods have been described previously<sup>3,4</sup>. A siRNA targeting human Na<sup>+</sup>/K<sup>+</sup>-ATPase  $\alpha 3$  subunit (5'-ACGACAACCGAUACCUGCUGGUGAU-3' and 5'-AUCACCAGCAGGUAUCGGUUGUCGU-3') and a control nonspecific scrambled siRNA (5'-UUCUCCGAACGUGUCACGU-3' and 5'-ACGUGACACGUUCGGAGAA-3') were purchased from GenePharma (Shanghai, China). Cells were grown to 60-70% confluence, and incubated with siRNAs at a final concentration of 0.1  $\mu$ M by using Lipofectamine<sup>TM</sup> 2000 (Invitrogen, Beijing, China) in a serum-free medium for 48 h and then subjected to the assays.

### **Measurement of mitochondrial membrane potential**

A lipophilic cationic dye, JC-1, was used to measure changes in mitochondrial membrane potential ( $\Delta\Psi_M$ ). Cells were incubated with 10  $\mu$ g/ml of JC-1 for 20 min at 37°C, washed three times and then resuspended in PBS at  $1 \times 10^6$  cells/ml. Cells were analyzed by flow cytometry at an excitation wavelength of 514 nm. Data were

collected at the emission wavelength of 529 nm (green fluorescence) of the JC-1 monomer and at 585 nm (red fluorescence) for JC-1 aggregates. The ratio of red/green fluorescence intensities was recorded, and the relative  $\Delta\Psi$ M was calculated.

### **Caspase-3 activity assay**

Cells were lysed and 100  $\mu$ g of lysates were incubated with caspase-3 colorimetric DEVD-pNA substrate at 37°C. The resulting colorimetric product was measured with a microplate spectrophotometer at 402 nm according to the instructions, supplied in the caspase-3 activity kit (ab39401, Abcam, Shanghai, China). Caspase-3 activity was calculated as a fold change in comparison to cells without treatment. All conditions were run in duplicate and three independent experiments were performed.

### **Immunohistochemistry and In situ Ki-67 proliferation index**

Formalin fixed tumor specimens were transferred to 70% ethanol and subsequently paraffin-embedded and sectioned. Tumor sections were rinsed with PBS, blocked with 3% BSA for 2 h, and incubated with Abs against Ki-67, p-Akt, p-Met, or cleaved caspase-3 at 4°C overnight. They were subsequently incubated for 30 min with the appropriate secondary Ab using the Ultra-Sensitive TMS-P kit (Zhongshan Co., Beijing, China), and immunoreactivity developed with Sigma FAST DAB (3,3'-diaminobenzidine tetrahydrochloride) and  $\text{CoCl}_2$  enhancer tablets (Sigma-Aldrich, Shanghai, China). Sections were counterstained with hematoxylin, mounted, and examined by microscopy. The Ki-67 positive cells were counted in 10

randomly selected  $\times$  400 high-power fields under microscopy. The Ki-67 proliferation index was calculated according to the following formula: the number of Ki-67 positive cells/ the total cell count  $\times$  100%.

### **In situ detection of apoptotic cells**

The above tumor sections were stained with the TUNEL (Terminal deoxynucleotidyl transferase dUTP nick end labeling) (Roche, Shanghai, China). The TUNEL positive cells were counted in 20 randomly selected  $\times$  200 high-power fields under microscopy. The apoptosis index was calculated according to the following formula: the number of apoptotic cells  $\times$  /total number of nucleated cells  $\times$  100%.

### **References**

- 1 He, C. *et al.* MiR-21 mediates sorafenib resistance of hepatocellular carcinoma cells by inhibiting autophagy via the PTEN/Akt pathway. *Oncotarget* **6**, 28867-28881, doi:10.18632/oncotarget.4814 (2015).
- 2 Zhai, B. *et al.* Inhibition of Akt reverses the acquired resistance to sorafenib by switching protective autophagy to autophagic cell death in hepatocellular carcinoma. *Molecular cancer therapeutics* **13**, 1589-1598, doi:10.1158/1535-7163.mct-13-1043 (2014).
- 3 Han, P. *et al.* Dual inhibition of Akt and c-Met as a second-line therapy following acquired resistance to sorafenib in hepatocellular carcinoma cells. *Molecular oncology* **11**, 320-334, doi:10.1002/1878-0261.12039 (2017).
- 4 Chen, D., Song, M., Mohamad, O. & Yu, S. P. Inhibition of Na<sup>+</sup>/K<sup>+</sup>-ATPase induces hybrid cell death and enhanced sensitivity to chemotherapy in human glioblastoma cells. *BMC cancer* **14**, 716, doi:10.1186/1471-2407-14-716 (2014).



**Table S1. Genes examined, primers used for RT-PCR and PCR products**

| Protein Name   | Gene Name | GenBank No.    | Primer                                                                              | PCR Product          |
|----------------|-----------|----------------|-------------------------------------------------------------------------------------|----------------------|
| $\alpha 1$     | ATP1A1    | NM_001160234.1 | Forward: 5'-GAAAGAAGTTTCTATGGATG-3'<br>Reverse: 5'-ATG ATTACAACGGCTGATAG-3'         | 318bp (nt 280-597)   |
| $\alpha 2$     | ATP1A2    | NM_000702.3    | Forward: 5'-AGAGAATGGGGGCGGCAAG-3'<br>Reverse: 5'-TGGTTCATCCTCCATGGCAGCC-3'         | 322bp (nt 180-501)   |
| $\alpha 3$     | ATP1A3    | NM_152296.4    | Forward: 5'-CCTCACTCAGAACCGCATGAC-3'<br>Reverse: 5'-TTCATCACCAGCAGGTATCGG-3'        | 384bp (nt1310-1693)  |
| $\alpha 4$     | ATP1A4    | NM_144699.3    | Forward: 5'-TATTTCAATGAGGAGCCTAC-3'<br>Reverse: 5'-CTGTGGAGTCTCCCGTAGC-3'           | 419bp (nt 816-1279)  |
| $\beta 1$      | ATP1B1    | NM_001677.3    | Forward: 5'-ACTGAAATTTCTTTTCGTCCTAAT-3'<br>Reverse: 5'-ATCACTGGGTAAGTCTCCA-3'       | 350bp (nt377-726)    |
| $\beta 2$      | ATP1B2    | NM_001678.4    | Forward: 5'-CTTGATGTCATTGTCAATGTCAAGT-3'<br>Reverse: 5'-TCGATGTTGCCGTTGGCGGGGAAC-3' | 401bp (nt900-1300)   |
| HIF-1 $\alpha$ | HIF1A     | NM_181054.2    | Forward: 5'-ATCCATGTGACCATGAGGAAATG-3'<br>Reverse: 5'-CTCGGCTAGTTAGGGTACTACTT-3'    | 126bp (nt 814-939)   |
| HIF-2 $\alpha$ | HIF2A     | NM_001430.4    | Forward: 5'-GTGCCATGACAAACATCTTCCAG-3'<br>Reverse: 5'-CTCGGGCTCTGTCTTCTTGCT-3'      | 107bp (nt 2204-2310) |
| VEGF           | VEGF      | AF022375       | Forward: 5'-GTCCAGGCTGCACCCATG-3'<br>Reverse: 5'-AGGAAGCTCATCTCTCCTA-3'             | 158 bp (nt 522-679)  |
| LDHA           | LDHA      | X02152         | Forward: 5'-GCTGGTCATTATCACGGCTG-3'<br>Reverse: 5'-AGCAACTTGACAGTTCGGGCTG-3'        | 128 bp (nt 361-488)  |
| GLUT1          | GLUT1     | K03195         | Forward: GAGTTCTACAACCAGACATGG                                                      | 167bp (nt 302-468)   |
| GAPDH          | GAPDH     | NM_002046.5    | Forward: 5'-CACCCATGGCAAATTCATGGCA-3'<br>Reverse: 5'-TCTAGACGGCAGGTCA GGTCCACC-3'   | 735bp (nt341-1075)   |

Notes: Protein names ( $\alpha 1$ ,  $\alpha 2$ ,  $\alpha 3$ ,  $\alpha 4$ ,  $\beta 1$  and  $\beta 2$ ) refer to subunits of Na<sup>+</sup>/K<sup>+</sup>-ATPase. Abbreviations: HIF, hypoxia-inducible factor; VEGF, vascular endothelial growth factor; LDHA, lactate dehydrogenase-A; GLUT1, glucose transporter 1; GAPDH, glyceraldehyde 3-phosphate dehydrogenase.

**Figure S1**

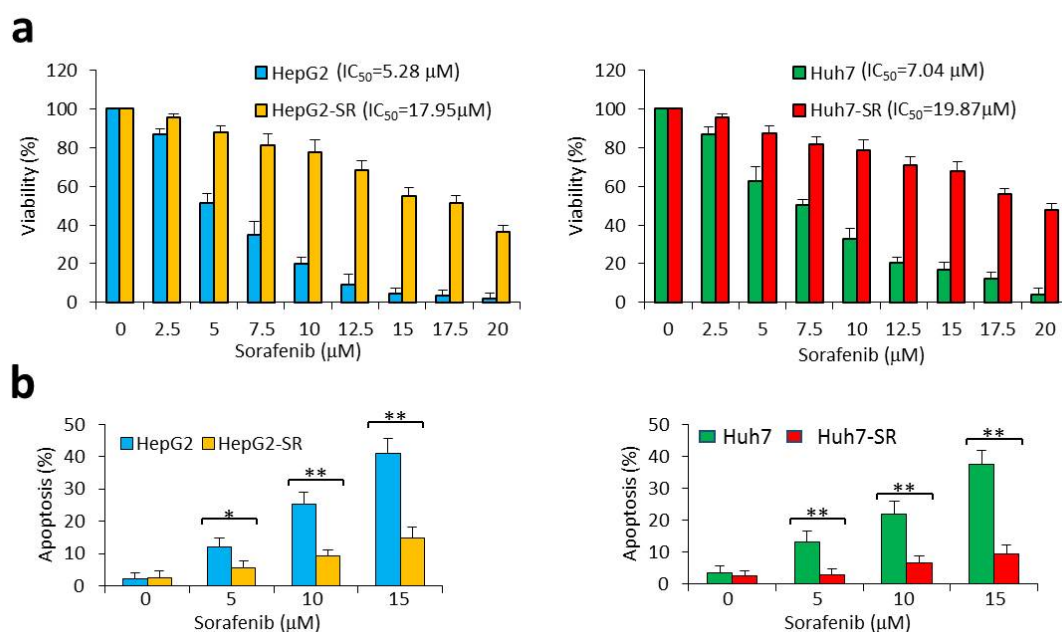

**Figure S1.** Sorafenib-resistant HCC cells are refractory to sorafenib-induced proliferation inhibition and apoptosis. **(a)** Sorafenib-resistant cells, HepG2-SR and Huh7-SR, and their parental HepG2 and Huh7 cells were incubated for 48 h with sorafenib at various concentrations as indicated. Cell viability (%) was compared with the respective untreated cells. The values of  $\text{IC}_{50}$  for each cell type were calculated. **(b)** Cells were incubated for 48 h with 0, 5, 10 or  $15 \mu\text{M}$  of sorafenib, and then analyzed to measure apoptosis rate (%). The density of each immunoblotting band was normalized to  $\beta$ -actin. “\*” indicates  $P < 0.05$ , and “\*\*”,  $P < 0.001$ .

**Figure S2**

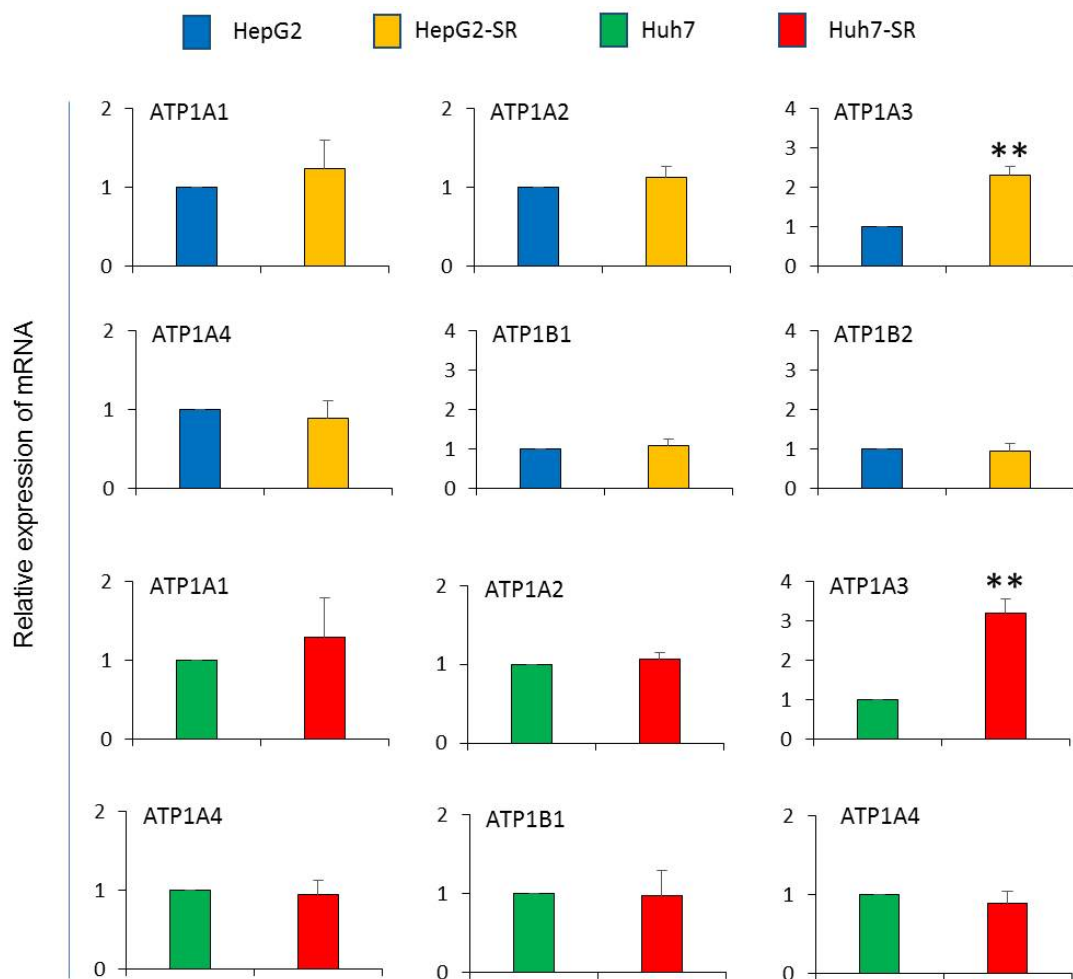

**Figure S2.** Expression of mRNA encoding Na<sup>+</sup>/K<sup>+</sup>-ATPase subunits in HCC cells.

HepG2, HepG2-SR, Huh7 and Huh7-SR cells were subjected to qRT-PCR with primers as shown in Table S1. The expression level from parental cells was defined 1.

“\*\*” (P<0.001) indicates a significant difference from respective parental cells.

**Figure S3**

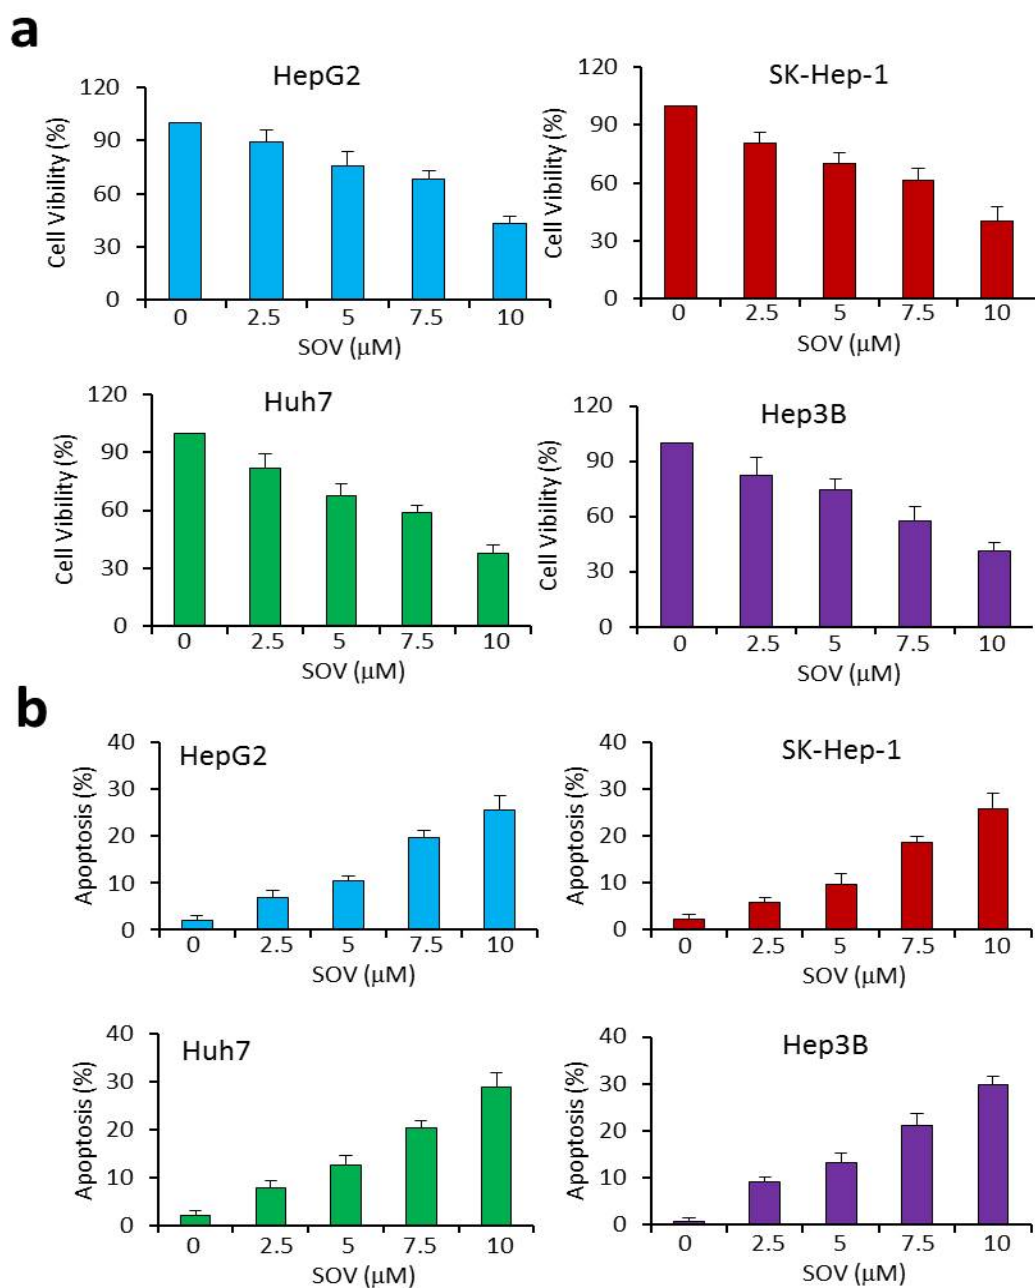

**Figure S3.** SOV inhibits the proliferation and induces the apoptosis of HCC cells.

HepG2, HepG2-SR, Huh7 and Huh7-SR cells were incubated for 48 h with SOV at various concentrations. **(a)** Cell viability (%) was compared with the respective untreated cells. **(b)** The apoptosis rate (%) was measured.

**Figure S4**

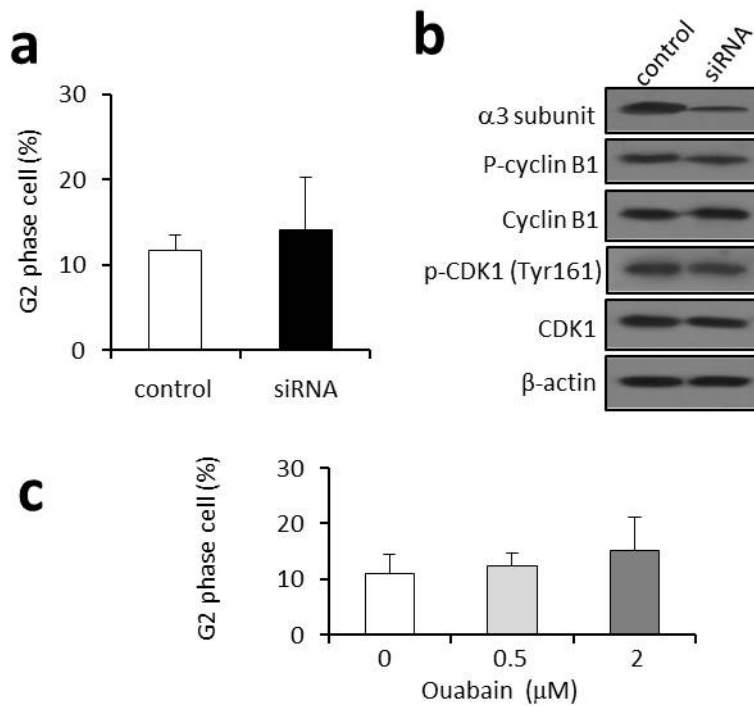

**Figure S4.** Inhibition of  $\text{Na}^+/\text{K}^+$ -ATPase does not induce cell cycle arrest. Huh7-SR cells were transfected with siRNA targeting  $\text{Na}^+/\text{K}^+$ -ATPase  $\alpha 3$  subunit for 24 h. **(a)** Cells were cytometrically analyzed for cell cycle distribution. The percentages of cells arrested at G2/M phases were plotted. **(b)** Cells were subjected to immunoblotting. The density of each band was normalized to  $\beta$ -actin. **(c)** Cells were incubated for 24 with ouabain at concentrations of 0, 0.5 or 2  $\mu\text{M}$ , and then subjected to cytometry for determining cell cycle distribution. The percentages of cells arrested at G2/M phases were plotted.

**Figure S5**

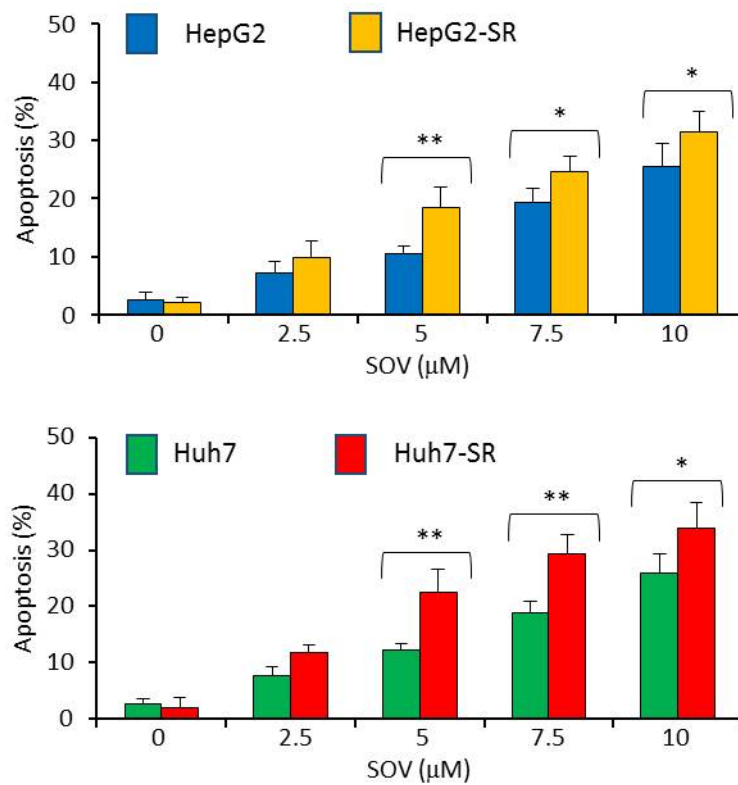

**Figure S5.** SOV induces apoptosis of HCC cells. HepG2, HepG2-SR, Huh7 and Huh7-SR cells were incubated for 24 h with various concentrations of SOV, and then subjected to apoptosis assays. “\*” indicates  $P < 0.05$ , and “\*\*”,  $P < 0.001$ .

**Figure S6**

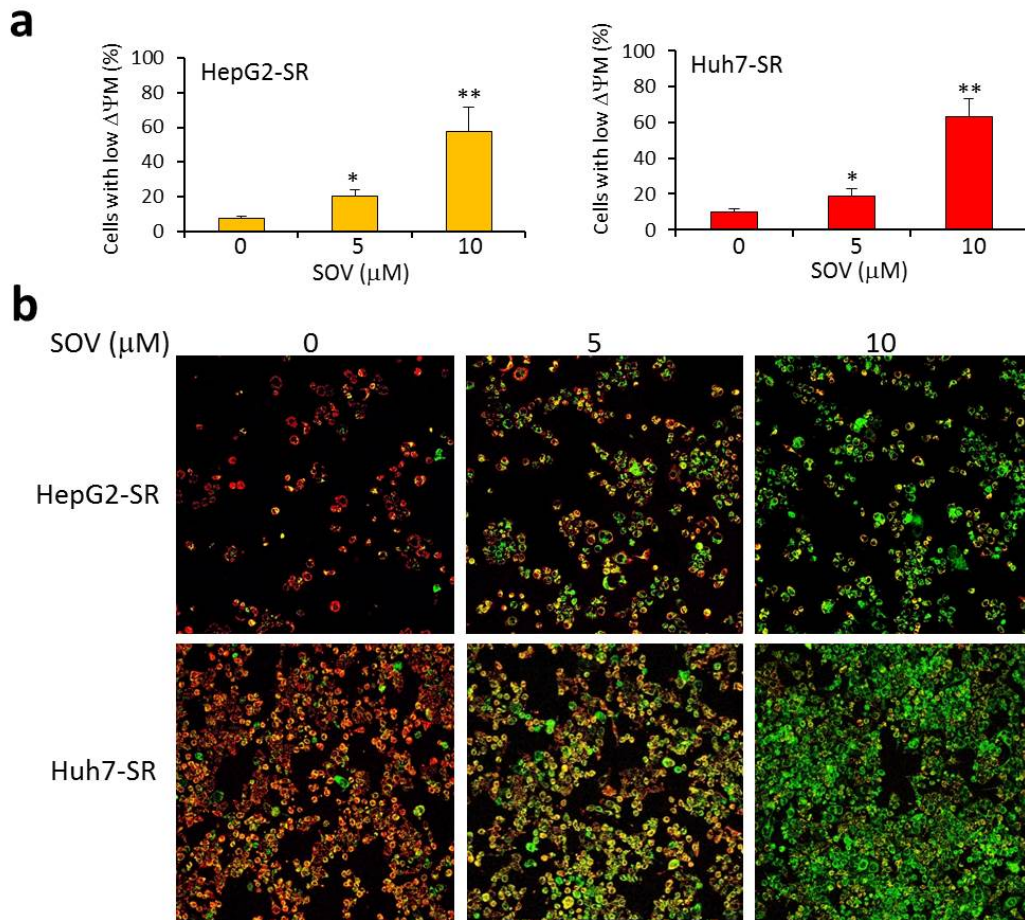

**Figure S6.** SOV reduces mitochondrial membrane potential ( $\Delta\Psi_M$ ) of sorafenib-resistant HCC cells. HepG2-SR and Huh7-SR cells were incubated with SOV (0, 5, 10  $\mu\text{M}$ ) for 24 h, and then stained with JC-1. **(a)** Cells with low  $\Delta\Psi_M$  (%) were plotted. **(b)** Representative images were from the above cells examined by fluorescence microscopy for detecting  $\Delta\Psi_M$ . “\*” ( $P<0.05$ ) and “\*\*” ( $P<0.001$ ) vs. untreated cells.

**Figure S7**

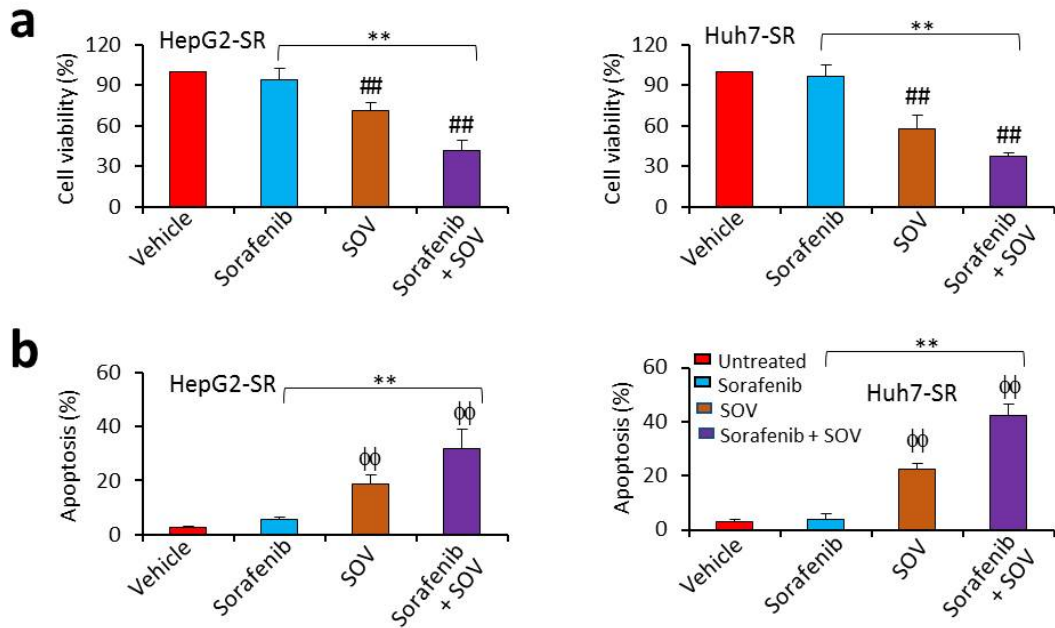

**Figure S7.** SOV enhances the effects of sorafenib against sorafenib-resistant HCC cells. HepG2-SR and Huh7-SR cells were incubated for 48 h with sorafenib (2.5 $\mu$ M), SOV (5 $\mu$ M) or their combination. Cells incubated with vehicle served as controls. (a) Cell viability (%) and (b) apoptosis rate (%) were measured. “\*” indicates  $P < 0.05$ , and “\*\*”  $P < 0.001$ . “#” ( $P < 0.05$ ) and “##” ( $P < 0.001$ ) indicate a significant reduction, and “ $\phi$ ” ( $P < 0.05$ ) and “ $\phi\phi$ ” (0.001), a significant increase, from vehicle-treated cells.



**Figure S8**

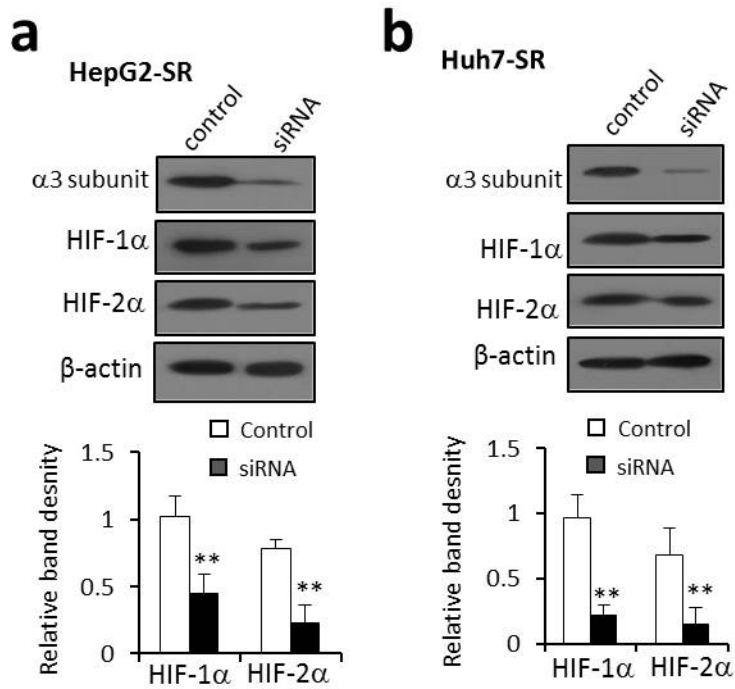

**Figure S8.** Depletion of Na<sup>+</sup>/K<sup>+</sup>-ATPase  $\alpha 3$  subunit downregulates the expression of HIF-1 $\alpha$  and HIF-2 $\alpha$  proteins. HepG2-SR (**a**) and Huh7-SR (**b**) cells were transfected with control siRNA or siRNA targeting Na<sup>+</sup>/K<sup>+</sup>-ATPase  $\alpha 3$  subunit for 24 h, and subjected to immunoblotting. The density of each immunoblotting band was normalized to  $\beta$ -actin. “\*\*\*” (P<0.001) indicates significant difference from control siRNA-transfected cells.

**Figure S9**

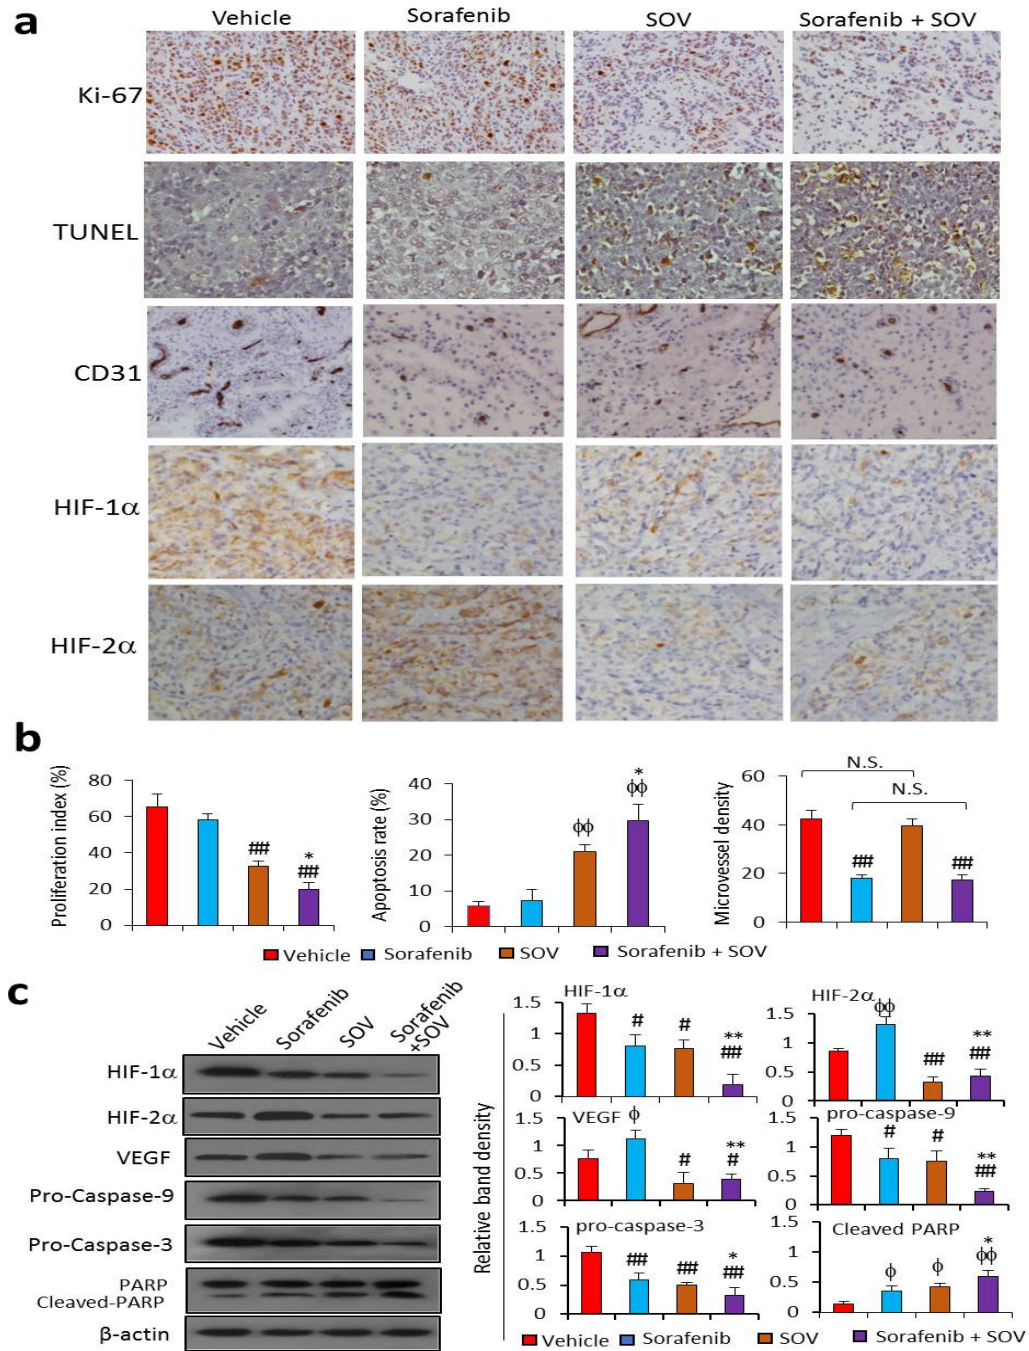

**Figure S9.** Cell proliferation, apoptosis, angiogenesis and gene expression in vivo. (a) Representative images of tumor sections taken from Figure 7 were immunostained with an anti-Ki67 Ab, TUNEL, anti-CD31 Ab, anti-HIF-1 $\alpha$  Ab, or anti-HIF-2 $\alpha$  Ab. (b) Proliferation index (%), apoptosis index (%) and microvessel density were quantified. (c) Tissue homogenates from tumors taken from Figure 7 were immunoblotted. The density of each immunoblotting band was normalized to  $\beta$ -actin. “#” (P<0.05) and “###” (P<0.001) indicate a significant reduction, and “ $\phi$ ” (P<0.05) and “ $\phi\phi$ ” (0.001), a significant increase, from vehicle-treated tumors. “\*” (P<0.05) and “\*\*” (P<0.001) vs. sorafenib alone-treated tumors.

## Full-length gels and blots of immunoblotting

Figure 1. b

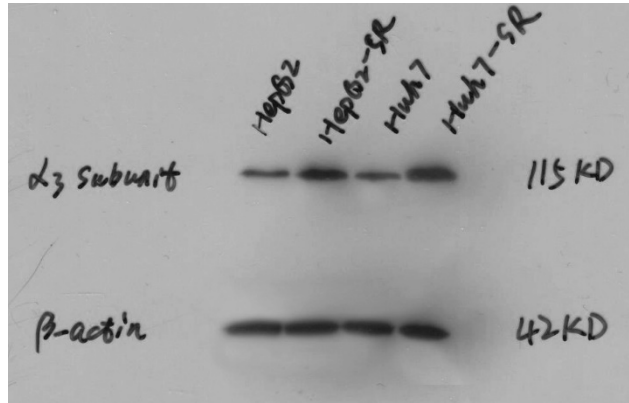

Figure 1. d

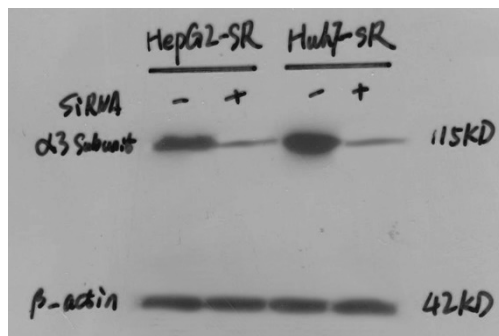

Figure. 2e

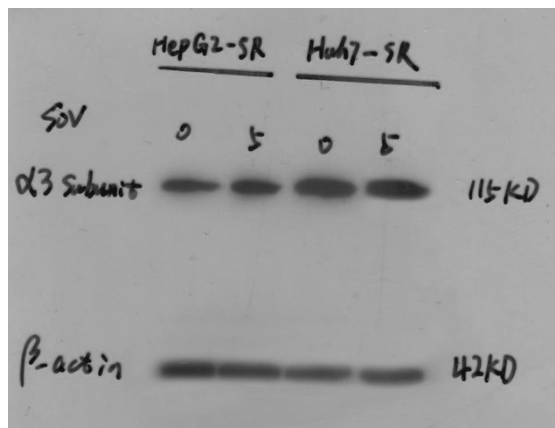

Figure 3d

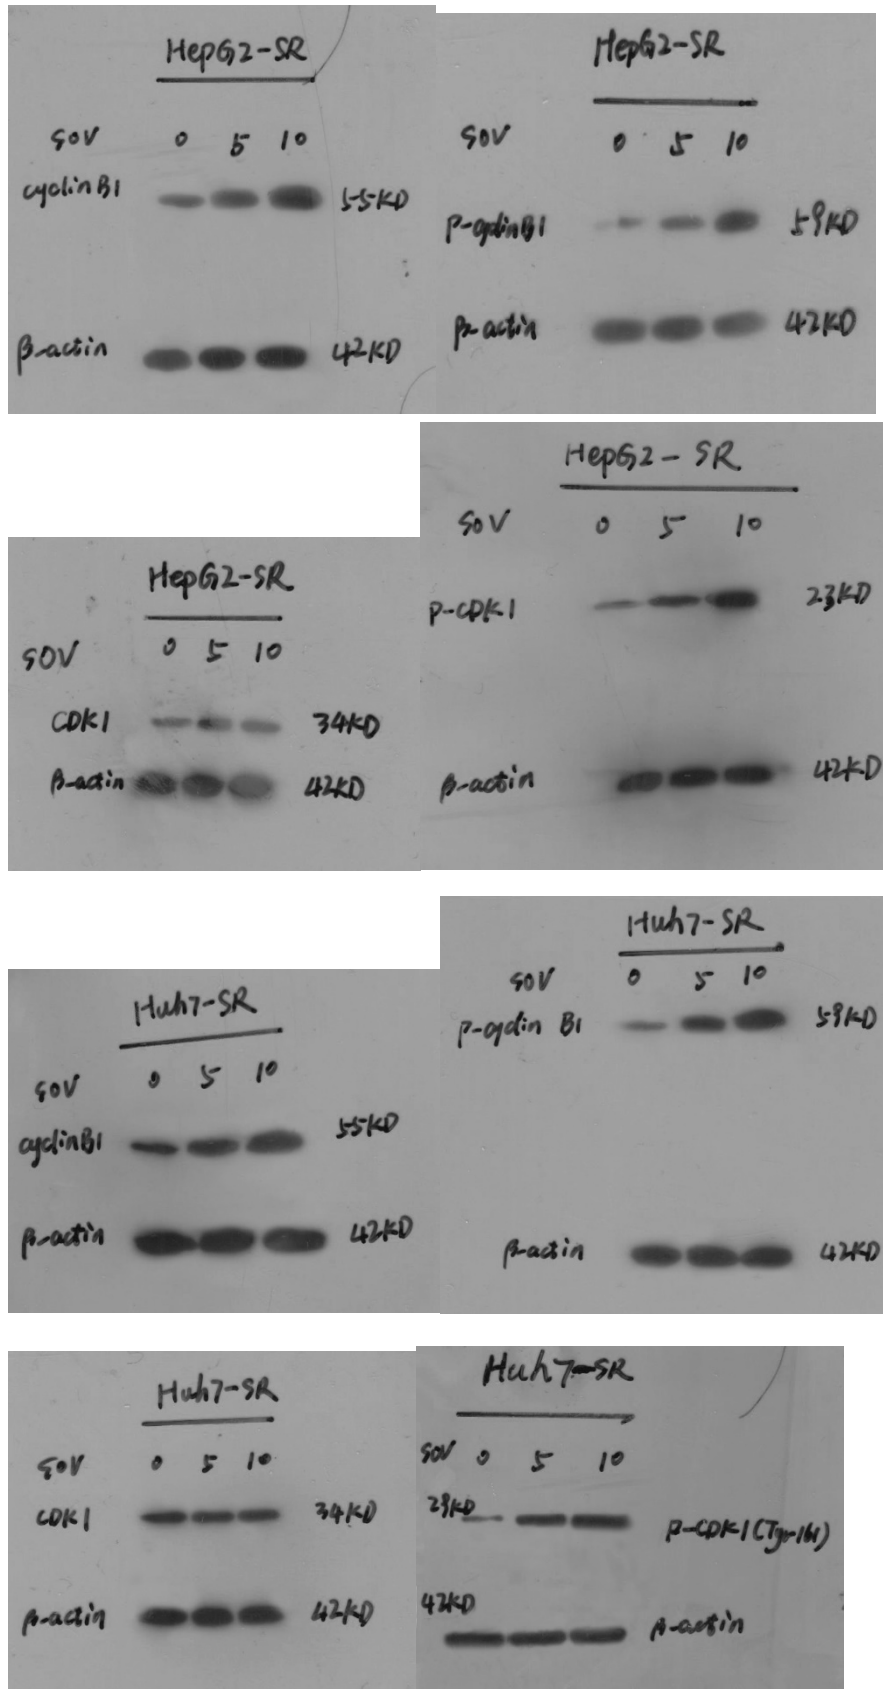

Figure. 4c

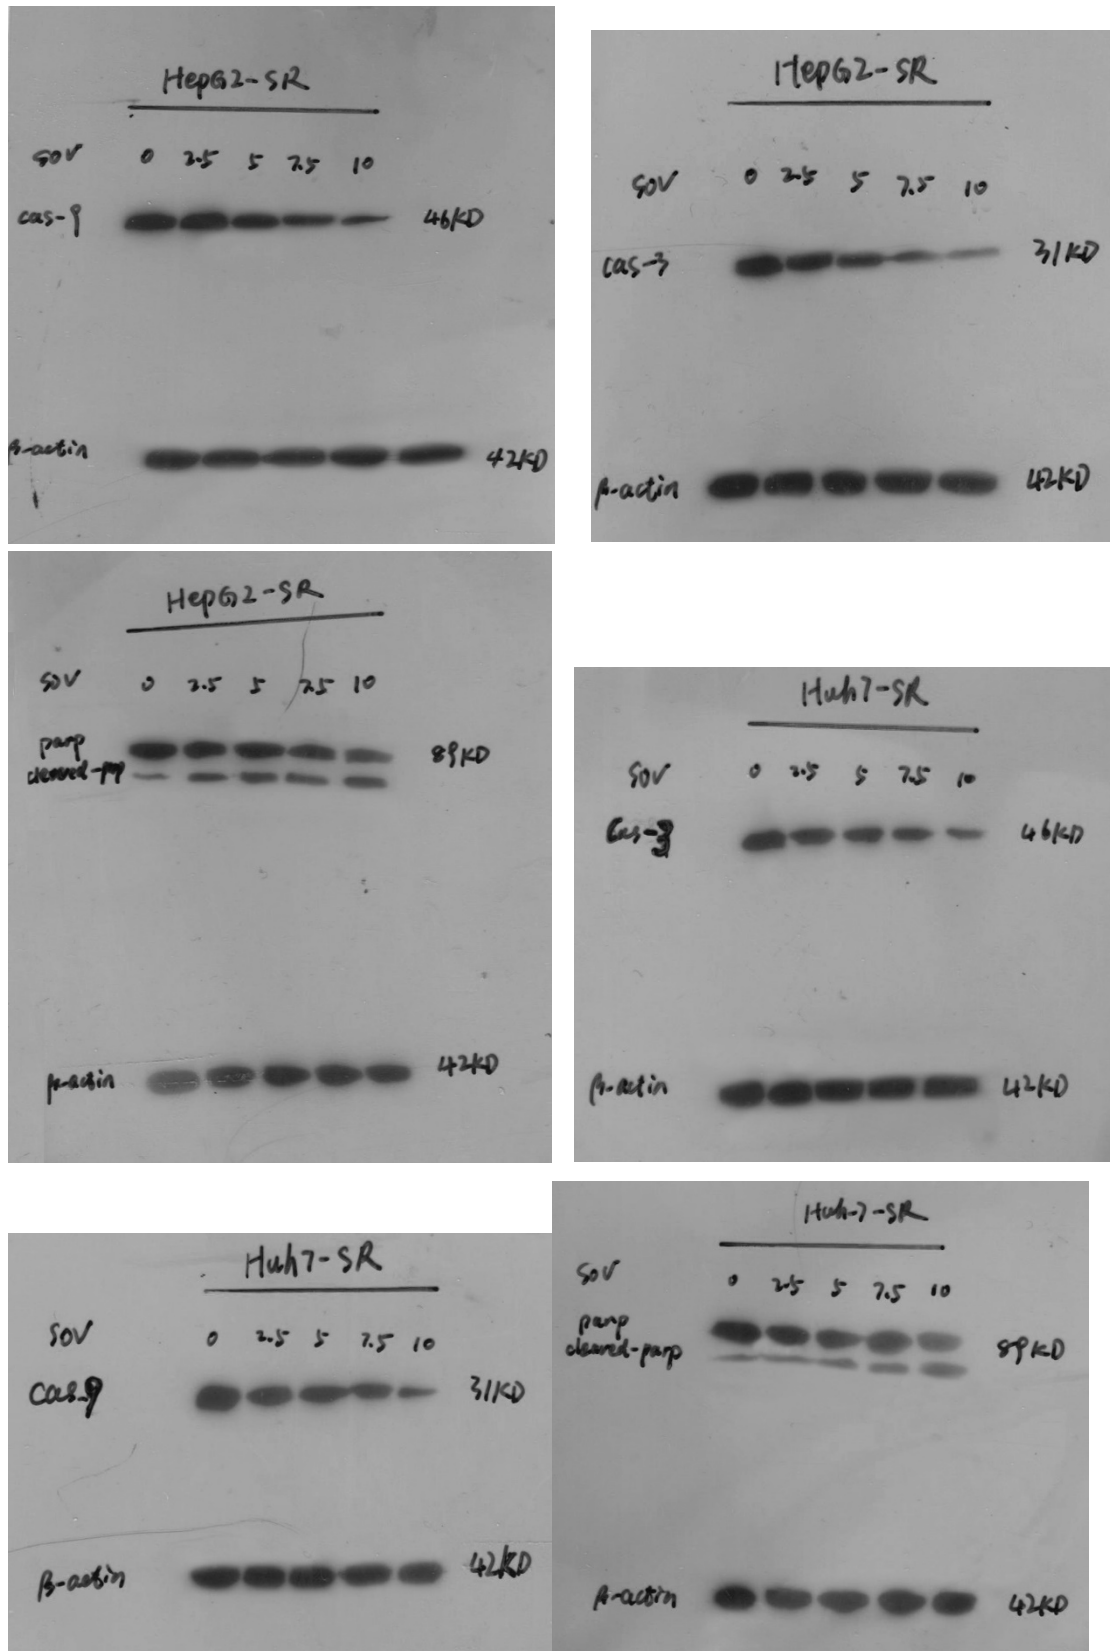

Figure. 5a

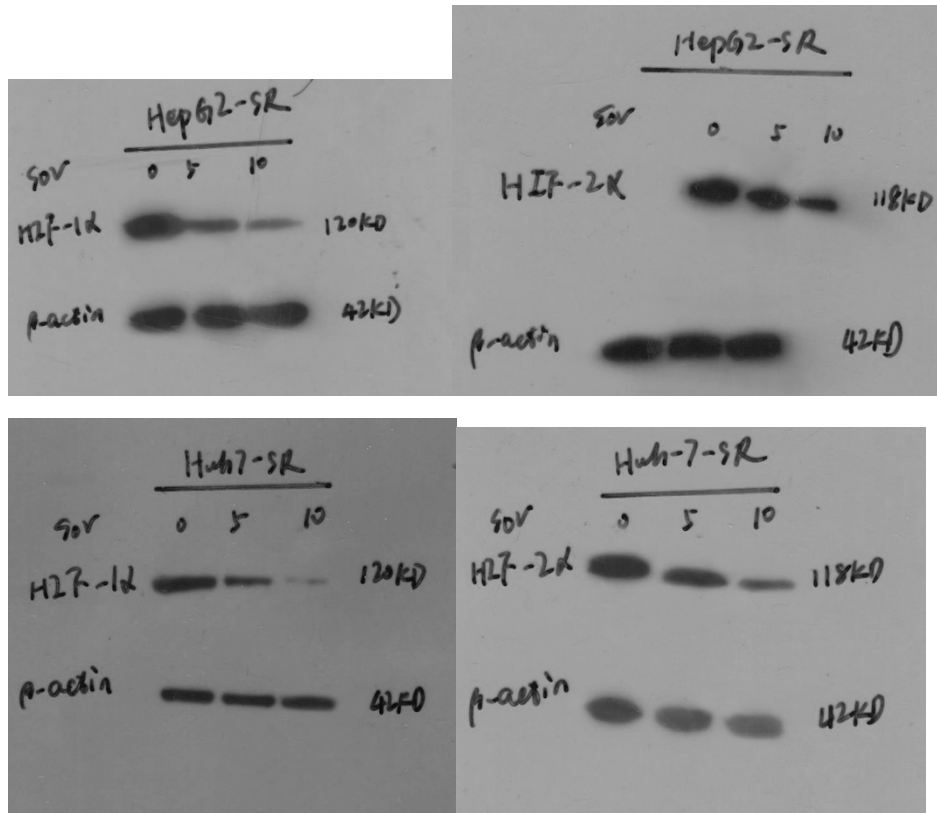

Figure. 5b

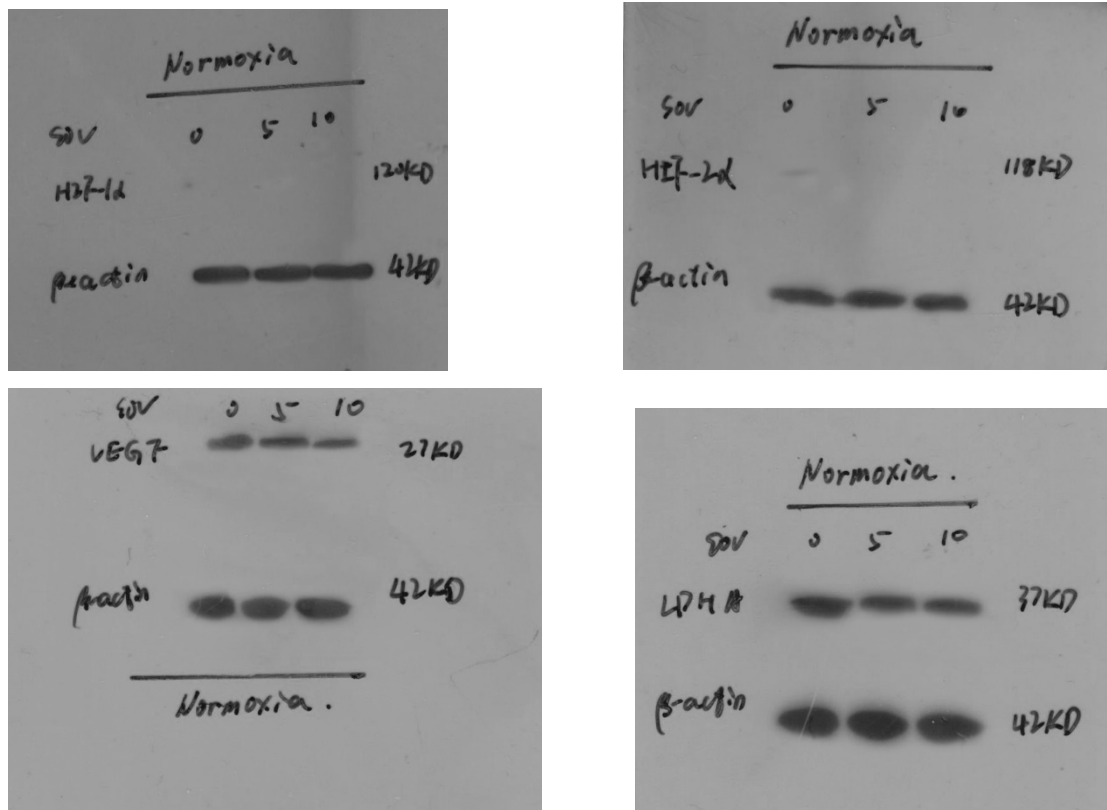

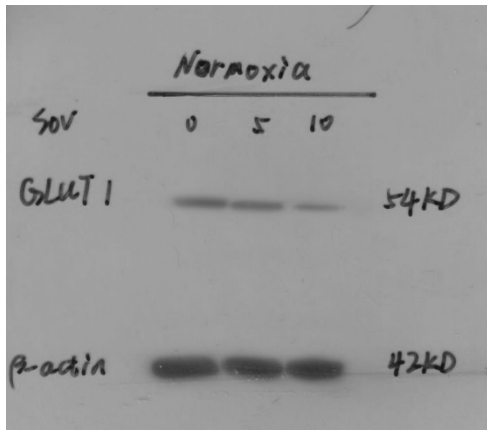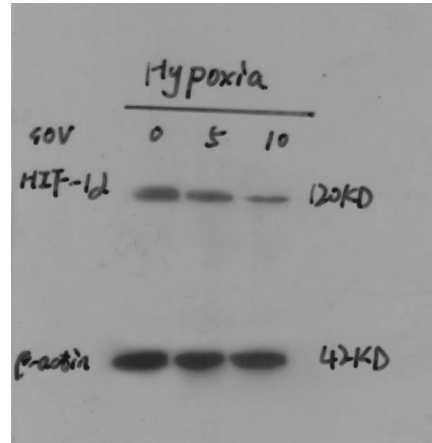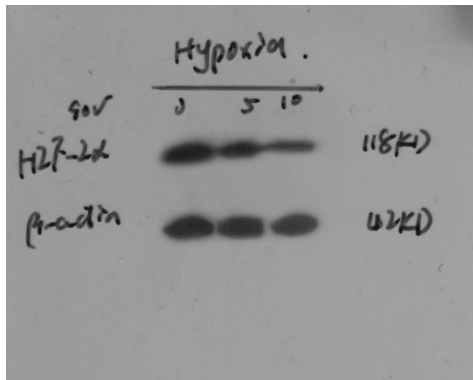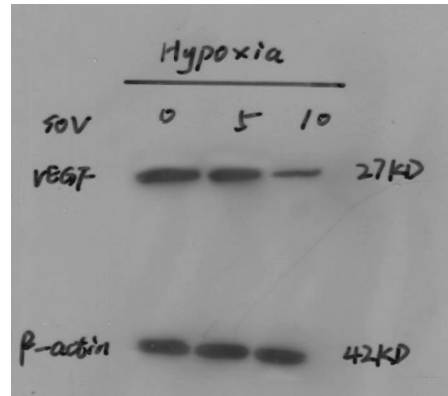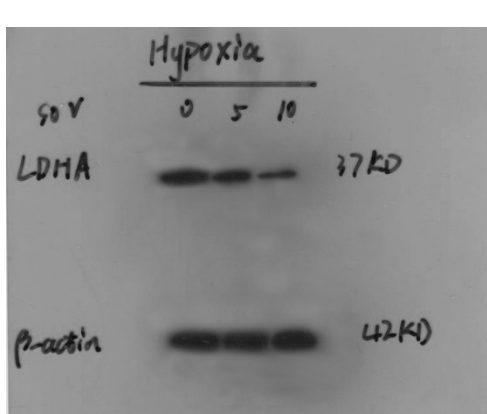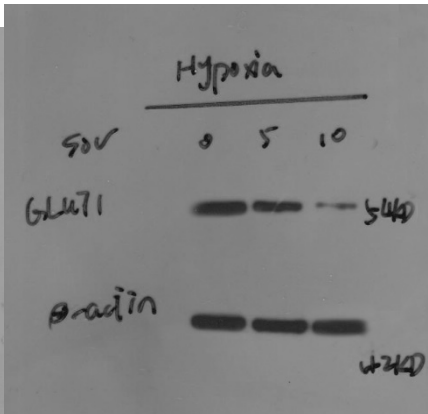

Figure. 6c

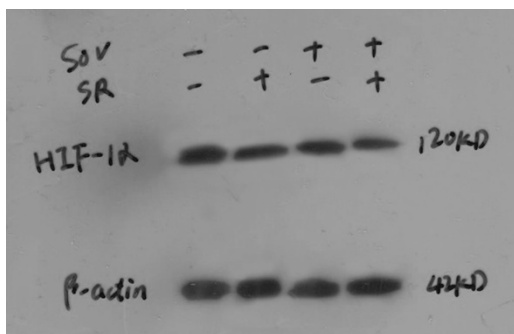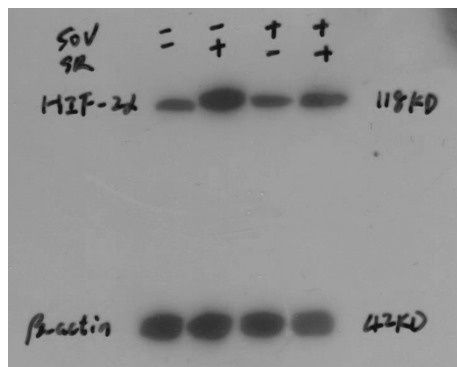

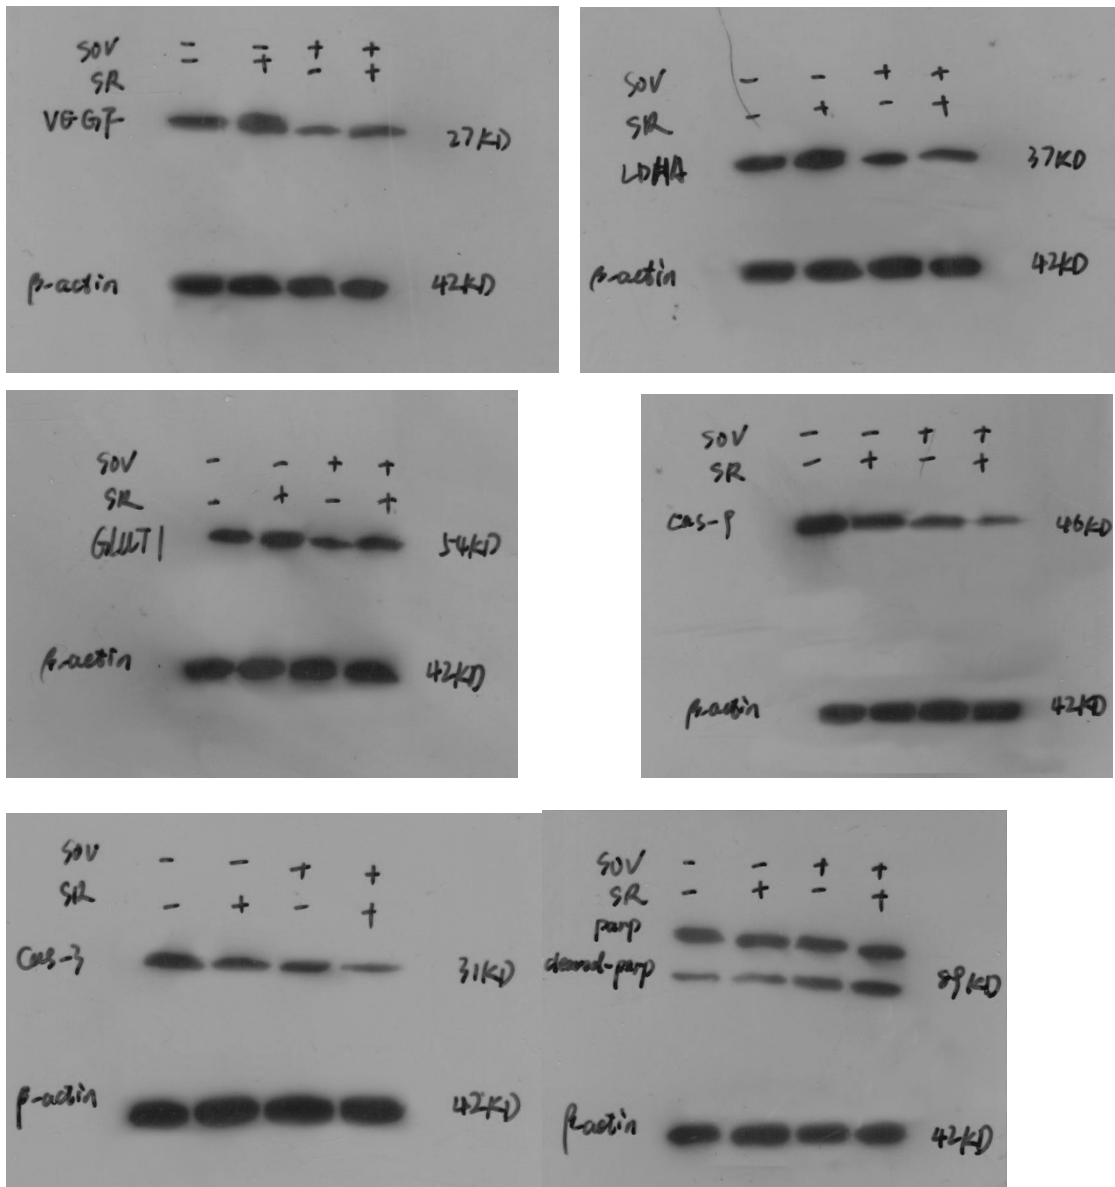

Figure S4b

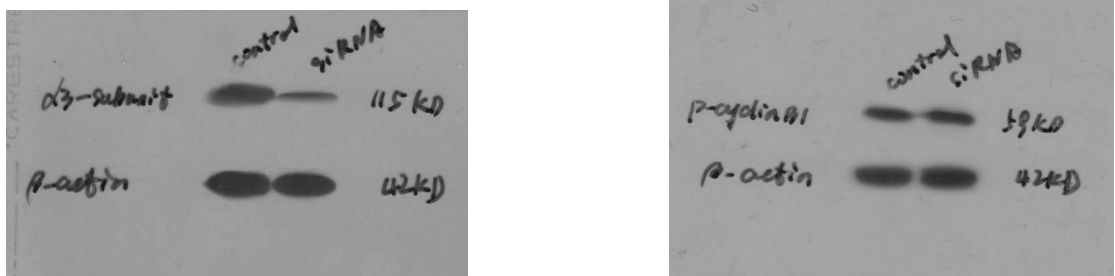



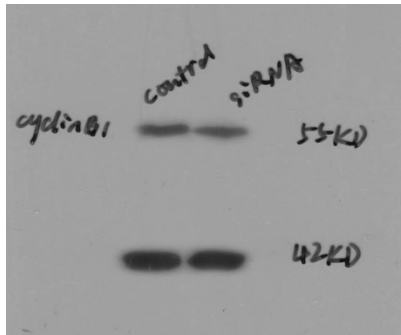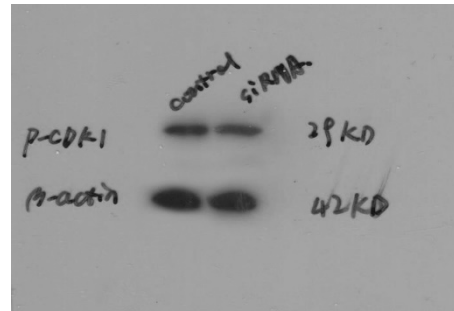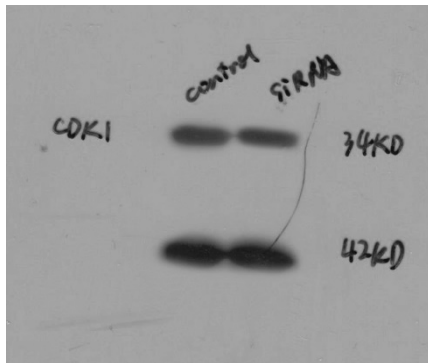

Figure S8a

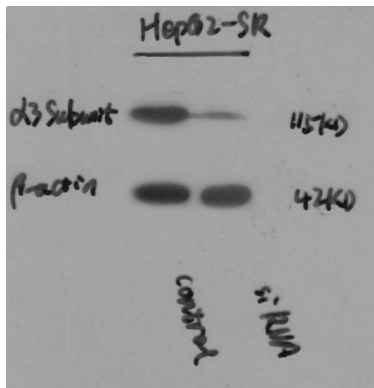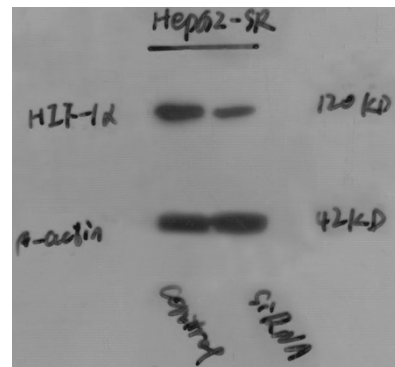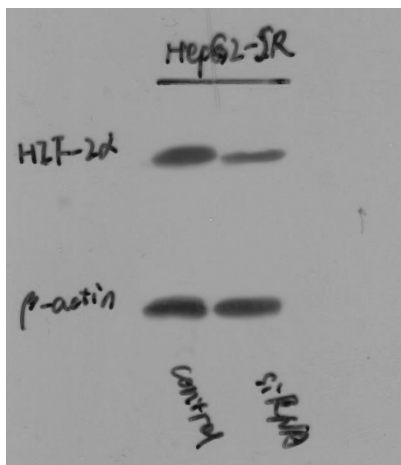

Figure S8b

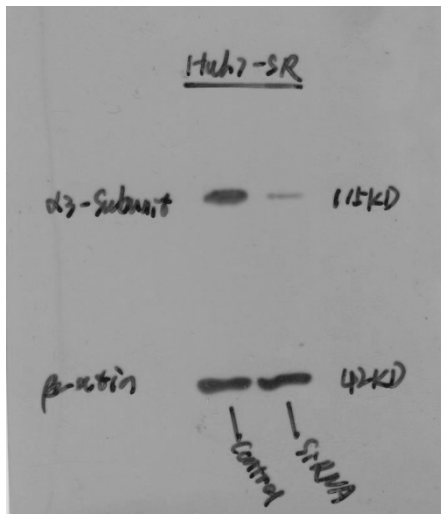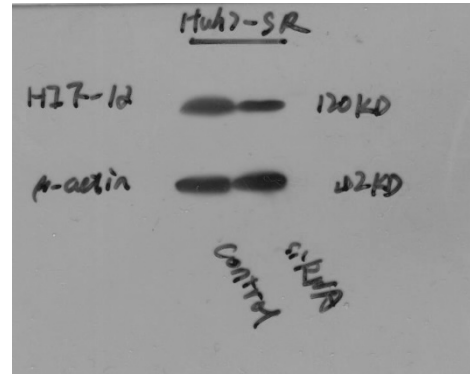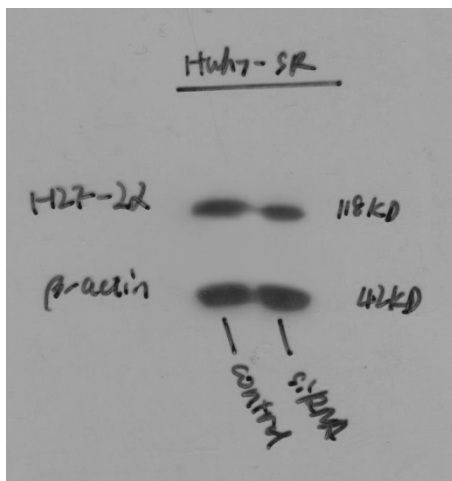

Figure S9c

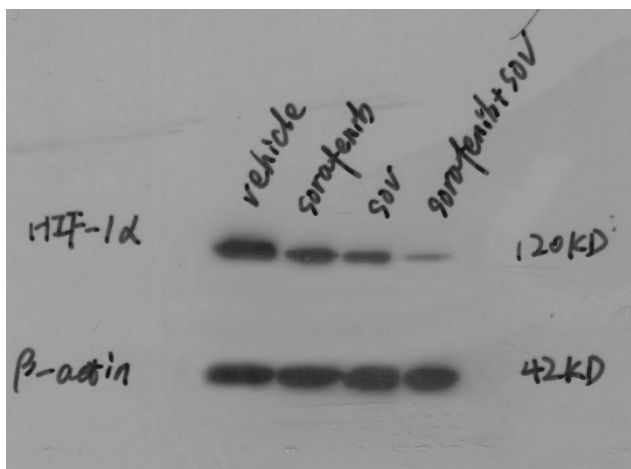

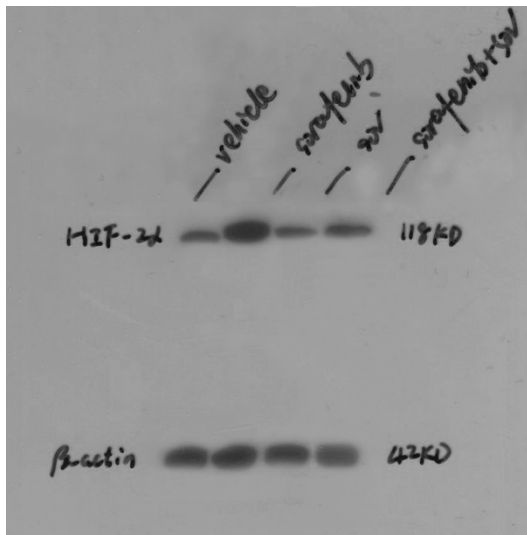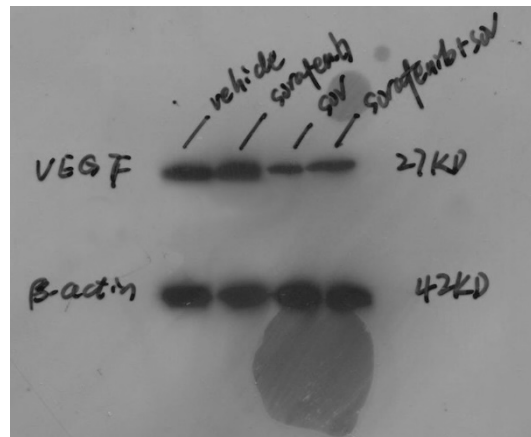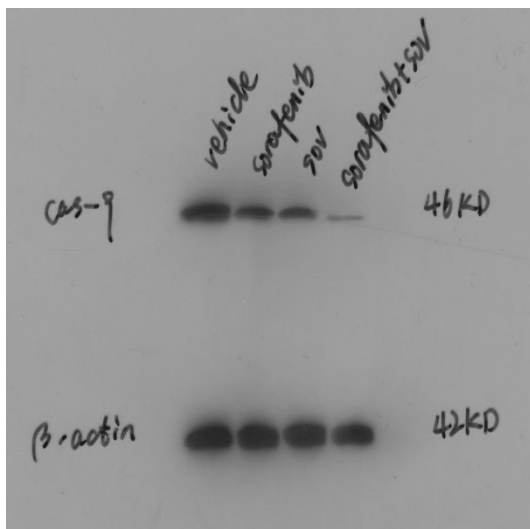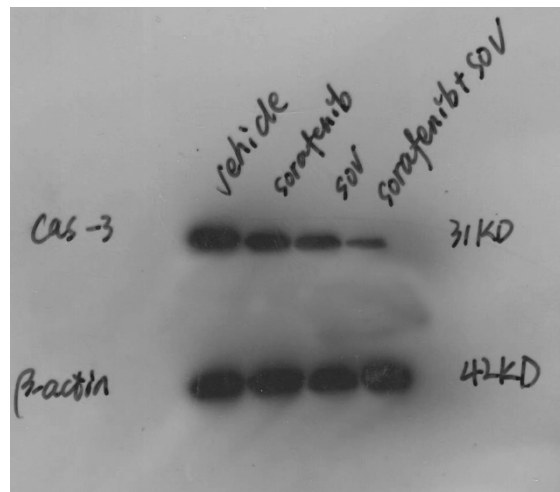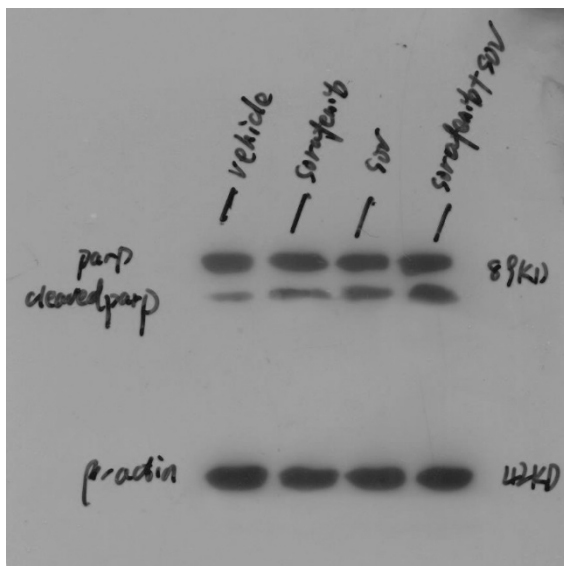

Supplement: 41598_2018_28010_MOESM1_ESM.pdf [file 41598_2018_28010_MOESM1_ESM.pdf]
